# Supplementary material for: Maternal Health Status Correlates with Nest Success of Leatherback Sea Turtles (Dermochelys coriacea) from Florida
Source: PLoS One. 2012 Feb 16;7(2):e31841. doi: 10.1371/journal.pone.0031841 (PMC3281022; doi:10.1371/journal.pone.0031841)
Supplement: Table S1 — Synopsis of hematologic values for leatherback sea turtles from the literature (Pacific Ocean). (DOC) [file pone.0031841.s001.doc]

Supplemental Table S1. Synopsis of hematologic values for leatherback sea turtles from the literature (Pacific Ocean).

|  | **California, Foraging Femalesb** | | | **California, Foraging Malesb** | | | **Costa Rica & Papua New Guineab,c** | | |
| --- | --- | --- | --- | --- | --- | --- | --- | --- | --- |
| **Parameters** | **n** | **Median** | **Range** | **n** | **Median** | **Range** | **n** | **Median** | **Range** |
| PCV (%) | 7 | 54d | 48-63 | 5 | 57 | 50-71 | 17 | 37 | 30-45 |
| RBC (x 103/µL) | 7 | 720d | 340-1060 | 5 | 580 | 470-930 | 17 | 380 | 140-590 |
| WBC (x 103/µL) | 7 | 12.3d | 9.0-20.3 | 5 | 12.3 | 8.3-16.0 | 17 | 8.4 | 4.5-9.5 |
| Heterophils (x 103/µL) | 7 | 7.4d | 4.1-9.1c | 5 | 7.4 | 5.9-9.1 | 17 | 2.6 | 1.4-5.6 |
| Lymphocytes (x 103/µL) | 7 | 3.9d | 1.8-6.2c | 5 | 2.6 | 1.8-6.2c | 17 | 4.1 | 2.3-6.6 |
| Monocytes (x 103/µL) | 7 | 0.5d | 0-1.3c | 5 | 0.2 | 0.1-0.5 | 17 | 0.1 | 0-0.3 |
| Eosinophils (x 103/µL) | 7 | 1.6 | 0-6.5c | 5 | 0.9 | 0.1-2.7 | 17 | 0.1 | 0-0.4 |
| Basophils (x103/ µL) | N/A | N/A | N/A | N/A | N/A | N/A | N/A | N/A | N/A |
| Heterophilsb (%) | 7 | 60.00e | N/A | 5 | 59.84e | N/A | 17 | 30.74e | N/A |
| Lymphocytesb (%) | 7 | 31.36e | N/A | 5 | 20.74e | N/A | 17 | 49.17e | N/A |
| Monocytesb (%) | 7 | 3.66e | N/A | 5 | 1.19e | N/A | 17 | 0.81e | N/A |
| Eosinophils (%) | 7 | 13.12e | N/A | 5 | 7.30e | N/A | 17 | 1.02e | N/A |
| Basophils (%) | N/A | N/A | N/A | N/A | N/A | N/A | N/A | N/A | N/A |
| a PCV = Packed cell volume, RBC = Red blood cells, WBC = White blood cells  b Harris et al. (2011), leatherbacks from Pacific Costa Rica and Papua New Guinea were nesting individuals  c No significant differences in hematology between nesting leatherbacks from Costa Rica and nesting leatherbacks from Papua New Guinea  d Significant difference between foraging leatherbacks and nesting female leatherbacks  e Estimated from blood cell counts | | | | | | | | | |
